# Supplementary material for: Monitoring Dynamic Braided River Habitats: Applicability and Efficacy of Aerial Photogrammetry from Manned Aircraft versus Unmanned Aerial Systems
Source: MDPI journal article supplement (doi:10.3390/drones5020039), 2021-05-17
Supplement: s1 [file s1]

### Supplementary material Table S1

**Table S1.** Summary of input requirements for various Manned and Unmanned flight missions for aerial photography of Aparima River Near Wreys Bush, Southland, NZ.

| Flying phase | Flight Type | Flight ID | Skillsets (no.) | Support Skillsets (no.) | Total Skillsets (no.) | Training (Days) | Logistical (Days) | Establishment Cost (US\$) | Administrative (Days) | Operational Cost (US\$) | Execution (Days) | Total time (Days) | Total Money (US\$) |
|--------------|-------------|-----------|-----------------|-------------------------|-----------------------|-----------------|-------------------|---------------------------|-----------------------|-------------------------|------------------|-------------------|--------------------|
| Pre          | Manned      | O1        | 1               | 0                       | 1                     | 15              | 7                 | 1400                      | 3                     | 700                     | 2                | 27                | 2100               |
|              |             | O2        | 1               | 0                       | 1                     | 1               | 1                 | 35                        | 3                     | 700                     | 2                | 7                 | 735                |
|              |             | O3        | 1               | 0                       | 1                     | 1               | 1                 | 35                        | 3                     | 700                     | 2                | 7                 | 735                |
|              | Unmanned    | U1        | 1               | 0                       | 1                     | 7               | 3                 | 350                       | 10                    | 7                       | 1                | 21                | 357                |
|              |             | U2        | 1               | 0                       | 1                     | 1               | 1                 | 35                        | 2                     | 35                      | 1                | 5                 | 70                 |
|              |             | U3        | 1               | 0                       | 1                     | 1               | 1                 | 35                        | 2                     | 35                      | 1                | 5                 | 70                 |
| Peri         | Manned      | O1        | 2               | 0                       | 2                     | 350             | 200               | 35,700                    | 2                     | 4060                    | 1                | 553               | 39,760             |
|              |             | O2        | 2               | 0                       | 2                     | 1               | 150               | 70                        | 2                     | 3710                    | 1                | 154               | 3780               |
|              |             | O3        | 2               | 0                       | 2                     | 1               | 150               | 70                        | 2                     | 3360                    | 1                | 154               | 3430               |
|              | Unmanned    | U1        | 1               | 1                       | 2                     | 30              | 5                 | 2800                      | 3                     | 700                     | 1                | 39                | 3500               |
|              |             | U2        | 1               | 1                       | 2                     | 1               | 5                 | 35                        | 2                     | 700                     | 1                | 9                 | 735                |
|              |             | U3        | 1               | 1                       | 2                     | 1               | 5                 | 35                        | 2                     | 700                     | 1                | 9                 | 735                |
| Post         | Manned      | O1        | 1               | 0                       | 1                     | 30              | 5                 | 1400                      | 1                     | 70                      | 25               | 61                | 1470               |
|              |             | O2        | 1               | 0                       | 1                     | 1               | 3                 | 35                        | 1                     | 70                      | 20               | 25                | 105                |
|              |             | O3        | 1               | 0                       | 1                     | 1               | 3                 | 35                        | 1                     | 70                      | 15               | 20                | 105                |
|              | Unmanned    | U1        | 1               | 0                       | 1                     | 30              | 2                 | 1400                      | 1                     | 70                      | 3                | 36                | 1470               |
|              |             | U2        | 1               | 0                       | 1                     | 1               | 1                 | 35                        | 1                     | 14                      | 2                | 5                 | 49                 |
|              |             | U3        | 1               | 0                       | 1                     | 1               | 1                 | 35                        | 1                     | 14                      | 2                | 5                 | 49                 |
| Overall      | Manned      | O1        | 4               | 0                       | 4                     | 395             | 212               | 38,500                    | 6                     | 4830                    | 28               | 641               | 43,330             |
|              |             | O2        | 4               | 0                       | 4                     | 3               | 153               | 140                       | 6                     | 4480                    | 23               | 185               | 4620               |
|              |             | O3        | 4               | 0                       | 4                     | 3               | 153               | 140                       | 6                     | 4130                    | 18               | 180               | 4270               |
|              | Unmanned    | U1        | 3               | 1                       | 4                     | 67              | 8                 | 4550                      | 14                    | 777                     | 5                | 94                | 5327               |
|              |             | U2        | 3               | 1                       | 4                     | 3               | 5                 | 105                       | 5                     | 749                     | 4                | 17                | 854                |
|              |             | U3        | 3               | 1                       | 4                     | 3               | 5                 | 105                       | 5                     | 749                     | 4                | 17                | 854                |

### Supplementary material Table S2

Table 2. Efficiency measures of the Manned and Unmanned flight missions for aerial imaging Aprima River, NZ.

| Flying phase | Flight Type | Flight ID | Efficiency    |            |                |            |
|--------------|-------------|-----------|---------------|------------|----------------|------------|
|              |             |           | Technological | Logistical | Administrative | Economical |
| Pre          | Manned      | O1        | 0.85          | 0.12       | 0.57           | 0.16       |
|              |             | O2        | 0.85          | 0.85       | 0.57           | 0.61       |
|              |             | O3        | 1.00          | 1.00       | 1.00           | 1.00       |
|              | Unmanned    | U1        | 1.00          | 0.33       | 0.20           | 0.24       |
|              |             | U2        | 1.00          | 1.00       | 1.00           | 1.00       |
|              |             | U3        | 1.00          | 1.00       | 1.00           | 1.00       |
| Peri         | Manned      | O1        | 0.85          | 0.02       | 0.85           | 0.02       |
|              |             | O2        | 0.85          | 0.43       | 0.85           | 0.17       |
|              |             | O3        | 1.00          | 1.00       | 1.00           | 1.00       |
|              | Unmanned    | U1        | 1.00          | 1.00       | 0.67           | 0.23       |
|              |             | U2        | 1.00          | 1.00       | 1.00           | 1.00       |
|              |             | U3        | 1.00          | 1.00       | 1.00           | 1.00       |
| Post         | Manned      | O1        | 0.85          | 0.17       | 0.85           | 0.07       |
|              |             | O2        | 0.85          | 0.85       | 0.85           | 0.40       |
|              |             | O3        | 1.00          | 1.00       | 1.00           | 1.00       |
|              | Unmanned    | U1        | 1.00          | 0.50       | 1.00           | 0.14       |
|              |             | U2        | 1.00          | 1.00       | 1.00           | 1.00       |
|              |             | U3        | 1.00          | 1.00       | 1.00           | 1.00       |
| Overall      | Manned      | O1        | 0.64          | 0.02       | 0.71           | 0.02       |
|              |             | O2        | 0.64          | 0.64       | 0.71           | 0.16       |
|              |             | O3        | 1.00          | 1.00       | 1.00           | 1.00       |
|              | Unmanned    | U1        | 1.00          | 0.63       | 0.36           | 0.18       |
|              |             | U2        | 1.00          | 1.00       | 1.00           | 1.00       |
|              |             | U3        | 1.00          | 1.00       | 1.00           | 1.00       |
